# Supplementary material
Source: Elsevier journal article supplement (https://www.sciencedirect.com/science/article/pii/S188558572500088X)
Supplement: mmc1 [file mmc1.pdf]

## SUPPLEMENTARY DATA

**Table 1 of the supplementary data.** Study inclusion and exclusion criteria

| Inclusion criteria                                                                                                                      | Exclusion criteria                                                                                                                        |
|-----------------------------------------------------------------------------------------------------------------------------------------|-------------------------------------------------------------------------------------------------------------------------------------------|
| <i>Clinical</i>                                                                                                                         |                                                                                                                                           |
| Age > 18 y                                                                                                                              | Age < 18 y                                                                                                                                |
| Diagnosis of ischemic heart disease                                                                                                     | Inability to give informed consent                                                                                                        |
|                                                                                                                                         | Female with child-bearing potential                                                                                                       |
|                                                                                                                                         | Life expectancy < 12 mo                                                                                                                   |
|                                                                                                                                         | Factors making clinical follow-up difficult (such as no fixed address)                                                                    |
|                                                                                                                                         | Poor cardiac function as defined by global left ventricular ejection fraction $\leq 30\%$                                                 |
|                                                                                                                                         | Recent (< 7 d) ST-segment elevation myocardial infarction                                                                                 |
|                                                                                                                                         | Recent (< 48 h) non-ST-segment elevation myocardial infarction                                                                            |
|                                                                                                                                         | Prior ST-segment elevation myocardial infarction in the territory supplied by the vessel with the intermediate lesion under investigation |
|                                                                                                                                         | Severe myocardial hypertrophy (interventricular septum thickness > 15 mm, ECG Sokolow's criteria fulfilled)                               |
|                                                                                                                                         | Severe valvular heart disease                                                                                                             |
|                                                                                                                                         | Significant platelet count alteration (< 100 000 cells/mm <sup>3</sup> or > 700 000 cells/mm <sup>3</sup> )                               |
|                                                                                                                                         | Gastrointestinal bleeding requiring surgery or blood transfusions within the previous 4 wk                                                |
|                                                                                                                                         | History of clotting pathology                                                                                                             |
|                                                                                                                                         | Known hypersensitivity to aspirin, heparin, or contrast dye                                                                               |
|                                                                                                                                         | Advanced renal failure with a glomerular filtration rate < 30 mL/min                                                                      |
| <i>Angiographic</i>                                                                                                                     |                                                                                                                                           |
| Single-vessel disease with angiographically intermediate coronary lesion OR                                                             | Multivessel disease with one or more untreated angiographically critical stenosis or coronary occlusion                                   |
| Multivessel disease with only angiographically intermediate coronary lesion OR                                                          | Lesions in coronary artery bypass grafts                                                                                                  |
| Multivessel disease with a least 1 angiographically intermediate coronary lesion and already treated angiographically critical stenosis | Multivessel disease requiring coronary aortic bypass graft intervention                                                                   |

**Table 2 of the supplementary data.** Baseline patient characteristics according to lesion complexity and treatment arm

|                                                                                                                                                                                                                                                                                                                                                                                                                                                                                   | Complex<br>(n = 199) |                  |      | Noncomplex<br>(n = 151) |                 |      |
|-----------------------------------------------------------------------------------------------------------------------------------------------------------------------------------------------------------------------------------------------------------------------------------------------------------------------------------------------------------------------------------------------------------------------------------------------------------------------------------|----------------------|------------------|------|-------------------------|-----------------|------|
|                                                                                                                                                                                                                                                                                                                                                                                                                                                                                   | OCT<br>(n = 99)      | FFR<br>(n = 100) | P    | OCT<br>(n = 75)         | FFR<br>(n = 76) | P    |
| <i>Age, y</i>                                                                                                                                                                                                                                                                                                                                                                                                                                                                     | 70 [64-76]           | 69 [62-75]       | .579 | 69 [62-76]              | 68 [62-75]      | .984 |
| <i>Male sex</i>                                                                                                                                                                                                                                                                                                                                                                                                                                                                   | 77 (77.8)            | 78 (78.0)        | .970 | 56 (74.7)               | 50 (65.8)       | .233 |
| <i>BMI, kg/m<sup>2</sup></i>                                                                                                                                                                                                                                                                                                                                                                                                                                                      | 26 [23-29]           | 26 [24-28]       | .675 | 28 [24-29]              | 27 [24-29]      | .173 |
| <i>Diabetes mellitus</i>                                                                                                                                                                                                                                                                                                                                                                                                                                                          | 37 (37.4)            | 33 (33.0)        | .519 | 18 (24.0)               | 20 (26.3)       | .743 |
| <i>Hypertension</i>                                                                                                                                                                                                                                                                                                                                                                                                                                                               | 86 (86.9)            | 81 (81.0)        | .260 | 65 (86.7)               | 67 (88.2)       | .782 |
| <i>Dyslipidemia</i>                                                                                                                                                                                                                                                                                                                                                                                                                                                               | 77 (77.8)            | 67 (67.0)        | .089 | 53 (70.7)               | 53 (69.7)       | .901 |
| <i>Smoking</i>                                                                                                                                                                                                                                                                                                                                                                                                                                                                    | 38 (38.4)            | 42 (42.0)        | .603 | 28 (37.3)               | 27 (35.5)       | .818 |
| <i>Family history of CAD</i>                                                                                                                                                                                                                                                                                                                                                                                                                                                      | 37 (37.4)            | 26 (26.0)        | .085 | 22 (29.3)               | 26 (34.2)       | .520 |
| <i>Chronic kidney disease</i>                                                                                                                                                                                                                                                                                                                                                                                                                                                     | 19 (19.2)            | 21 (21.0)        | .750 | 12 (16.0)               | 11 (14.5)       | .794 |
| <i>Previous PCI</i>                                                                                                                                                                                                                                                                                                                                                                                                                                                               | 40 (40.4)            | 35 (35.0)        | .432 | 36 (48.0)               | 37 (48.7)       | .933 |
| <i>Previous CABG</i>                                                                                                                                                                                                                                                                                                                                                                                                                                                              | 5 (5.1)              | 1 (1.0)          | .095 | 0 (0.0)                 | 3 (3.9)         | .082 |
| <i>Previous MI</i>                                                                                                                                                                                                                                                                                                                                                                                                                                                                | 27 (27.3)            | 17 (17.0)        | .081 | 25 (33.3)               | 16 (21.1)       | .090 |
| <i>Clinical presentation</i>                                                                                                                                                                                                                                                                                                                                                                                                                                                      |                      |                  | .502 |                         |                 | .704 |
| ACS                                                                                                                                                                                                                                                                                                                                                                                                                                                                               | 18 (18.2)            | 22 (22.0)        |      | 13 (17.3)               | 15 (19.7)       |      |
| CCS                                                                                                                                                                                                                                                                                                                                                                                                                                                                               | 81 (81.8)            | 78 (78.0)        |      | 62 (82.7)               | 61 (80.3)       |      |
| <i>LVEF, %</i>                                                                                                                                                                                                                                                                                                                                                                                                                                                                    | 60 [54-64]           | 60 [55-61]       | .277 | 60 [53-65]              | 60 [55-61]      | .134 |
| <i>Management</i>                                                                                                                                                                                                                                                                                                                                                                                                                                                                 |                      |                  |      |                         |                 |      |
| Patient treated with PCI                                                                                                                                                                                                                                                                                                                                                                                                                                                          | 57 (57.6)            | 41 (41.0)        | .019 | 34 (45.3)               | 18 (23.7)       | .005 |
| Contrast media, mL                                                                                                                                                                                                                                                                                                                                                                                                                                                                | 300 ± 134            | 266 ± 152        | .098 | 251 ± 118               | 205 ± 105       | .014 |
| CI-AKI                                                                                                                                                                                                                                                                                                                                                                                                                                                                            | 10 (10.1)            | 2 (2.0)          | .016 | 5 (6.7)                 | 1 (1.3)         | .092 |
| Dialysis                                                                                                                                                                                                                                                                                                                                                                                                                                                                          | 0 (0.0)              | 0 (0.0)          | .999 | 0 (0.0)                 | 0 (0.0)         | .999 |
| ACS, acute coronary syndrome; BMI, body mass index; CABG, coronary artery bypass grafting; CCS, chronic coronary syndrome; FFR, fractional flow reserve; MI, myocardial infarction; LVEF, left ventricular ejection fraction; OCT, optical coherence tomography; PCI, percutaneous coronary intervention.<br>The data are expressed as No. (%), mean ± standard deviation, or median [25th-75th percentile].<br>*Defined according to the Acute Kidney Injury Network definition. |                      |                  |      |                         |                 |      |

**Table 3 of the supplementary data.** Prevalence and overlap of the individual components of the complex lesion definition

|                           | Long lesion (n = 55) | Severely calcified lesion (n = 53) | Bifurcation lesion (n = 169) |
|---------------------------|----------------------|------------------------------------|------------------------------|
| Long lesion               | 17 (30.9)            | 4 (7.5)                            | 25 (14.8)                    |
| Severely calcified lesion | 4 (7.2)              | 22 (41.5)                          | 18 (10.7)                    |
| Bifurcation lesion        | 25 (45.5)            | 18 (34.0)                          | 117 (69.2)                   |
| All criteria              | 9 (16.4)             | 9 (17.0)                           | 9 (5.3)                      |

The data are presented as No. (%).

**Table 4 of the supplementary data.** Vessel characteristics according to lesion complexity and treatment arm

|                                                     | Complex<br>(n = 212) |                   |       | Noncomplex<br>(n = 208) |                  |       |
|-----------------------------------------------------|----------------------|-------------------|-------|-------------------------|------------------|-------|
|                                                     | OCT<br>(n = 102)     | FFR<br>(n = 110)  | P     | OCT<br>(n = 98)         | FFR<br>(n = 110) | P     |
| <i>FFR value</i>                                    |                      |                   |       |                         |                  |       |
| FFR baseline                                        | -                    | 0.83 [0.79-0.88]  | -     | -                       | 0.86 [0.82-0.91] | -     |
| FFR baseline $\leq 0.80$                            | -                    | 42 (38.2)         | -     | -                       | 22 (20.0)        | -     |
| <i>OCT parameters</i>                               |                      |                   |       |                         |                  |       |
| MLA, mm <sup>2</sup>                                | 2.39 [1.80-3.20]     | -                 | -     | 2.88 [2.32-3.55]        | -                | -     |
| AS, %                                               | 65 [59-73]           | -                 | -     | 65 [57-70]              | -                | -     |
| AS $\geq 75\%$                                      | 19 (18.8)            | -                 | -     | 12 (12.5)               | -                | -     |
| AS 50%-75% and MLA $< 2.5$ mm <sup>2</sup>          | 35 (34.7)            | -                 | -     | 28 (29.2)               | -                | -     |
| AS 50%-75% and plaque rupture                       | 5 (5.0)              | -                 | -     | 3 (3.1)                 | -                | -     |
| <i>Failure in crossing the lesion with the tool</i> | 1 (1.0)              | 0 (0.0)           | .298  | 1 (1.0)                 | 0 (0.0)          | .288  |
| <i>Investigated lesion location</i>                 |                      |                   | .555  |                         |                  | .117  |
| LAD                                                 | 76 (74.5)            | 85 (77.3)         |       | 52 (53.1)               | 64 (58.2)        |       |
| LCx                                                 | 11 (10.8)            | 14 (12.7)         |       | 13 (13.3)               | 22 (20.0)        |       |
| RCA                                                 | 15 (14.7)            | 11 (10.0)         |       | 33 (33.7)               | 24 (21.8)        |       |
| <i>Lesions treated with PCI</i>                     | 60 (58.8)            | 42 (38.2)         | .003  | 39 (39.8)               | 22 (20.0)        | .002  |
| <i>Number of stent(s)</i>                           | 1.0 [1.0-2.0]        | 1.0 [1.0-2.0]     | .969  | 1.0 [1.0-1.0]           | 1.0 [1.0-1.0]    | .418  |
| <i>Stent length, mm</i>                             | 34 [26-46]           | 36 [22-49]        | .764  | 22 [18-28]              | 26 [18-30]       | .163  |
| <i>Balloon predilatation</i>                        | 57 (95.0)            | 34 (82.9)         | .046  | 20 (52.6)               | 16 (72.7)        | .126  |
| <i>Balloon postdilatation</i>                       | 54 (90.0)            | 36 (87.8)         | .728  | 34 (89.5)               | 15 (75.0)        | .148  |
| <i>Calcium modification techniques*</i>             | 0 (0.0)              | 0 (0.0)           | 1.000 | 0 (0.0)                 | 0 (0.0)          | 1.000 |
| <i>Long lesion</i>                                  | 27 (26.5)            | 28 (25.5)         | .866  | 0 (0.0)                 | 0 (0.0)          | -     |
| Treated with PCI                                    | n = 27, 19 (70.4)    | n = 28, 18 (64.3) | .173  | -                       | -                | -     |
| <i>Severely calcified lesion</i>                    | 24 (23.5)            | 29 (26.4)         | .634  | 0 (0.0)                 | 0 (0.0)          | -     |
| Treated with PCI                                    | n = 24, 13 (54.2)    | n = 29, 7 (24.1)  | .694  | -                       | -                | -     |
| <i>Bifurcation lesion</i>                           | 81 (79.4)            | 88 (80.0)         | .915  | 0 (0.0)                 | 0 (0.0)          | -     |
| Treated with PCI                                    | n = 81, 48 (59.3)    | n = 88, 37 (42.0) | .220  | -                       | -                | -     |

|                                                                                                                                                                                                                                                                                                                                                                             |                    |                   |        |                    |                   |        |
|-----------------------------------------------------------------------------------------------------------------------------------------------------------------------------------------------------------------------------------------------------------------------------------------------------------------------------------------------------------------------------|--------------------|-------------------|--------|--------------------|-------------------|--------|
| Treated with double-stenting technique                                                                                                                                                                                                                                                                                                                                      | n = 81, 2 (2.5)    | n = 88, 0 (0.0)   | .138   | -                  | -                 | -      |
| Acute side-branch occlusion during PCI                                                                                                                                                                                                                                                                                                                                      | n = 48, 0 (0.0)    | n = 37, 0 (0.0)   | 1.000  | -                  | -                 | -      |
| <i>Poststenting assessment according to protocol</i>                                                                                                                                                                                                                                                                                                                        | n = 60, 51 (85.0)  | n = 42, 26 (61.9) | .008   | n = 39, 33 (84.6)  | n = 22, 14 (63.6) | .061   |
| Poststenting optimal result                                                                                                                                                                                                                                                                                                                                                 | n = 51, 30 (58.8)  | n = 26, 12 (46.2) | .291   | n = 33, 21 (63.6)  | n = 14, 9 (64.3)  | .966   |
| PCI optimization                                                                                                                                                                                                                                                                                                                                                            | n = 51, 21 (41.2)  | n = 26, 5 (19.2)  | .054   | n = 33, 12 (36.4)  | n = 14, 1 (7.1)   | .041   |
| Further balloon dilation                                                                                                                                                                                                                                                                                                                                                    | n = 51, 19 (37.3)  | n = 26, 5 (19.2)  | .106   | n = 33, 11 (33.3)  | n = 14, 1 (7.1)   | .060   |
| Additional stent implantation                                                                                                                                                                                                                                                                                                                                               | n = 51, 5 (9.8)    | n = 26, 1 (3.8)   | .356   | n = 33, 3 (9.1)    | n = 14, 1 (7.1)   | .827   |
| Final optimal result                                                                                                                                                                                                                                                                                                                                                        | n = 45, 45 (100.0) | n = 24, 14 (58.3) | < .001 | n = 32, 32 (100.0) | n = 14, 9 (64.3)  | < .001 |
| <p>FFR, fractional flow reserve; LAD, left anterior descending artery; LCx, left circumflex artery; MI, myocardial infarction; OCT, optical coherence tomography; PCI, percutaneous coronary intervention; RCA, right coronary artery.</p> <p>The data are expressed as No. (%) or median [25th-75th percentile].</p> <p>*Rota-ablation, ShockWave, or cutting balloon.</p> |                    |                   |        |                    |                   |        |

**Table 5 of the supplementary data.** Clinical outcomes according to lesion complexity

|                                                                                                                                                                           | Complex<br>(n = 212) | Noncomplex<br>(n = 208) | Hazard ratio<br>(95%CI) | <i>P</i> |
|---------------------------------------------------------------------------------------------------------------------------------------------------------------------------|----------------------|-------------------------|-------------------------|----------|
| <i>MACE</i>                                                                                                                                                               | 44 (20.8)            | 29 (13.9)               | 1.52 (0.95-2.44)        | .078     |
| <i>Cardiac death or MI</i>                                                                                                                                                | 10 (4.7)             | 7 (3.4)                 | 1.42 (0.54-3.73)        | .476     |
| <i>All-cause death</i>                                                                                                                                                    | 27 (12.7)            | 17 (8.2)                | 1.57 (0.86-2.88)        | .145     |
| <i>Cardiac death</i>                                                                                                                                                      | 6 (2.8)              | 5 (2.4)                 | 1.19 (0.36-3.90)        | .775     |
| <i>MI</i>                                                                                                                                                                 | 5 (2.4)              | 2 (1.0)                 | 2.48 (0.48-12.76)       | .279     |
| <i>TVR</i>                                                                                                                                                                | 17 (8.0)             | 12 (5.8)                | 1.40 (0.67-2.94)        | .368     |
| Due to side-branch<br>restenosis                                                                                                                                          | 1 (0.5)              | 0 (0.0)                 | -                       | -        |
| MACE, major adverse cardiac events; MI, myocardial infarction; TVR, target vessel<br>revascularization.<br>Unless otherwise indicated, the data are expressed as No. (%). |                      |                         |                         |          |

**Table 6 of the supplementary data.** Subgroup analysis for the primary outcome according to angiographic lesion complexity and PCI/deferral

|            | Deferred        |                 |                  |          | PCI            |                |                  |          | <i>P</i> <sub>interaction</sub> |
|------------|-----------------|-----------------|------------------|----------|----------------|----------------|------------------|----------|---------------------------------|
|            | OCT             | FFR             | HR (95%CI)       | <i>P</i> | OCT            | FFR            | HR (95%CI)       | <i>P</i> |                                 |
| Complex    | 7/42<br>(16.7)  | 22/68<br>(32.4) | 0.47 (0.20-1.11) | .085     | 8/60<br>(13.3) | 7/42<br>(16.7) | 0.79 (0.29-2.18) | .651     | .451                            |
| Noncomplex | 13/59<br>(22.0) | 8/88<br>(9.1)   | 2.63 (1.09-6.34) | .032     | 6/39<br>(15.4) | 2/22<br>(9.1)  | 1.65 (0.33-8.19) | .538     | .614                            |

Unless otherwise indicated, the data are expressed as No. (%).
